# Supplementary material
Source: publisher figshare collection journal article supplement (https://gsapubs.figshare.com/ndownloader/files/23316851)
Supplement: Supplementary file 1 [file 23316851]

## Sheet: Guantan Section
Sample	Position	Ccarb	Ocarb	CaCo3	TOC	Corg	PC [%]	RC [%]	TOC [%]	MINC [%]	HI [mg HC/g TOC]	OI [mg CO2/g TOC]	Tmax [°C]	S1 [mg HC/g]	S2a [mg HC/g]	S2b [mg HC/g]	S3
GUA 735	1	4.88168	-5.12244	75.6785	0.497749	-26.1345	0.0123061	0.0212857	0.0335919	10.3563	274.635	321.714	458.13	0.0205012	0.0922552	0	0.10807
GUA 734	2	5.3073	-4.79653	59.0653
GUA 733	3.2	3.7	-5.81	89
GUA 732	4	3.27	-5.96	92	0.739092	-27.1385	0.0111736	0.0219248	0.0330983	11.0765	247.849	294.962	458.174	0.0205085	0.0820339	0	0.0976275
GUA 731	4.5	4.81079	-5.36549	76.5365
GUA 730	5.2	5.26491	-4.45726	90.8618
GUA 729	6.1	5.22391	-4.64845	101.865	0.471051	-26.7285	0.00948377	0.0154721	0.0249558	10.2219	246.626	392.663	461.217	0.0205158	0.0615475	0	0.0979923
GUA 728	6.75	5.33879	-4.74467	79.8947
GUA 727	7.5	4.80269	-5.13292	78.3602
GUA 726	8.25	5.06724	-4.38288	74.0109	0.433543	-27.0002	0.00834639	0.0199793	0.0283257	9.97479	217.363	308.655	454.261	0.0102616	0.0615695	0	0.0874286
GUA 725	8.9	4.51265	-5.77607	85.4535
GUA 724	9.2	4.72151	-4.60024	79.5597
GUA 723	9.7	4.49515	-5.57785	61.2832	0.425817	-27.4469	0.0106597	0.0138528	0.0245125	10.2165	293.143	447.49	455.304	0.0205305	0.0718567	0	0.109691
GUA 722	10	4.47305	-5.3677	85.2037
GUA 721	10.8	4.55054	-5.1182	83.4256
GUA 720	11.5	5.21822	-4.2371	81.0989	0.365098	-26.633	0.0086686	0.0161035	0.0247721	9.64556	248.721	399.993	462.348	0.0102689	0.0616135	0	0.0990867
GUA 719	12	5.06134	-4.74756	76.2802
GUA 718	12.25	5.56595	-5.12869	77.352
GUA 717	12.75	5.11293	-5.10146	86.6825	0.364126	-25.6277	0.01129	0.0254366	0.0367266	11.2032	195.793	361.052	425.391	0.0205452	0.0719081	0	0.132602
GUA 716	13	4.57943	-5.56217	78.6723
GUA 715	13.5	4.12222	-5.80397	81.1615
GUA 714	14	4.7598	-5.86892	76.1578	0.277725	-25.2887
GUA 713	14.8	4.80969	-5.81196	81.0155
GUA 712	15.2	5.3254	-5.53994	45.3066
GUA 711	15.5	5.08294	-5.44564	85.0463
GUA 710	15.75	5.00205	-5.30699	84.9477	0.176409	-24.9456	0.0110036	0.0292923	0.0402959	10.3571	178.514	302.755	454.435	0.0205525	0.0719337	0	0.121998
GUA 709	16.25	5.09414	-4.64547	19.2849
GUA 708	16.7	4.37507	-6.2514	80.5189
GUA 707	17	4.2336	-7.06476	77.2168
GUA 706	17.25	3.86896	-7.26125	69.0895	0.313906	-24.1433	0.0127249	0.0254226	0.0381476	11.104	215.582	320.974	463.478	0.0308397	0.0822393	0	0.122444
GUA 705	17.5	2.19	-8.4	69
GUA 704	17.75	3.55672	-8.45141	72.395
GUA 702	18	3.90666	-7.20198	90.7444	0.0573944	-21.6495	0.00987515	0.0183379	0.028213	9.97541	218.699	395.979	463.522	0.0205672	0.0617015	0	0.111718
GUA 703	18.25	3.80998	-8.90914	81.4943
GUA 701	18.75	4.65902	-7.15261	91.5097
GUA 700	19.2	3.62841	-9.38621	80.5864	0.105396	-23.7688	0.0110483	0.028625	0.0396733	10.3364	181.51	310.878	462.565	0.0205745	0.0720107	0	0.123335
GUA 500	20	4.90266	-6.66001	88.4732	0.903229	-24.9302	0.0190085	0.148069	0.167077	10.1238	53.4707	164.024	420	0.0496319	0.0893375	0	0.274048
GUA 501	20.5	4.75356	-5.79987	99.8284	0.910665	-25.1087	0.0126826	0.0817987	0.0944813	10.3618	73.5893	172.252	422	0.0297978	0.0695281	0	0.162746
GUA 502	21.2	4.18157	-8.06486	99.001	1.0486	-24.8892	0.0168309	0.0842897	0.101121	11.11	98.2864	191.527	430	0.0397551	0.0993878	0	0.193673
GUA 503	22.7	4.01757	-7.19528	100.404
GUA 504	23.7	4.21167	-8.26611	90.4402	0.866887	-24.8174	0.0179327	0.0546829	0.0726155	10.7499	150.649	196.942	426	0.0596699	0.109395	0	0.143011
GUA 505	24.7	3.94017	-6.94371	63.4532
GUA 506	25.7	4.30397	-5.0061	90.5026	4.49294	-26.0569	0.0140991	0.0732276	0.0873268	11.2761	102.558	175.835	425	0.0298535	0.0895606	0	0.153551
GUA 507	26.3	3.96367	-8.20069	100.109	0.978011	-25.5727	0.0146609	0.0437344	0.0583952	11.0271	170.517	245.942	461	0.0298721	0.0995737	0	0.143618
GUA 508	27	3.01109	-6.80499	100.804	1.90546	-26.6958	0.0143955	0.0381236	0.0525191	10.5822	208.685	254.464	459	0.0199271	0.109599	0	0.133642
GUA 509	28	2.62589	-6.76449	91.8699	0.59486	-26.6027	0.020795	0.0728693	0.0936643	10.3573	149.018	230.973	450	0.0398791	0.139577	0	0.216339
GUA 510	29	3.82898	-5.44613	99.8289
GUA 511	30	2.79679	-8.04254	95.5043	0.728653	-26.5671	0.0149873	0.0730746	0.088062	10.8841	113.283	175.846	454	0.0299279	0.0997596	0	0.154854
GUA 512	31	3.86637	-9.05209	98.7981	1.6865	-26.1504	0.0130458	0.0492849	0.0623307	11.1444	160.148	182.571	459	0.0199643	0.0998216	0	0.113798
GUA 513	32.2	3.82998	-6.4958	98.7286
GUA 514	32.8	3.93977	-7.43608	99.5664	0.428393	-26.612	0.014453	0.0763955	0.0908485	9.74193	109.945	148.347	456	0.0299651	0.0998836	0	0.134771
GUA 515	33.7	4.13987	-5.97246	93.0753
GUA 516	34.5	3.93737	-7.93268	92.8049	0.327211	-27.4209	0.0130712	0.0458911	0.0589622	10.2885	169.508	193.812	460	0.0199891	0.0999456	0	0.114276
GUA 517	35.5	3.58818	-8.89662	88.4024
GUA 518	36.5	3.44738	-9.0341	103.528
GUA 519	37.5	3.85767	-6.42441	91.0827	1.23357	-26.0885	0.0292692	0.409434	0.438703	8.79489	41.0331	71.1898	465	0.0700053	0.180014	0	0.312312
GUA 520	38.7	4.28517	-6.33071	104.233
GUA 521	40	3.92817	-8.18213	100.323
GUA 522	41	4.35207	-4.86574	93.5036
GUA 523	42.3	4.01747	-5.05478	91.1989	0.398718	-26.8124	0.0158958	0.116604	0.1325	10.8624	75.5244	118.1	426	0.0400278	0.100069	0	0.156482
GUA 524	43.7	4.18903	-3.82986	84.8425
GUA 525	44.5	3.39789	-5.49184	87.5862	6.00704	-26.493	0.0131577	0.066888	0.0800456	9.88057	100.074	222.017	469	0.0200263	0.0801052	0	0.177715
GUA 527	44.5	4.22373	-4.65233	103.589
GUA 526	46.4	4.38553	-4.0876	93.8696
GUA 528	48.5	4.32103	-4.2066	106.788
GUA 529	50	4.63024	-2.93898	111.466
GUA 530	51	4.85185	-2.79053	92.9442	0.805825	-26.4789	0.0136678	0.0635666	0.0772344	9.43984	129.726	135.633	453	0.030058	0.100193	0	0.104755
GUA 531	52	4.47084	-4.22565	96.2486
GUA 532	53	4.83315	-4.83715	68.6824	1.02282	-27.0645	0.0189594	0.0971146	0.116074	10.4435	112.284	99.4793	435	0.0601532	0.130332	0	0.11547
GUA 533	54	4.74395	-3.74972	81.502
GUA 534	55	4.37009	-3.66513	107.269
GUA 535	56	4.56354	-5.80865	97.635
GUA 536	57	4.78135	-6.02762	55.0677	0.438208	-26.5372	0.016191	0.114552	0.130743	8.40035	92.0746	80.4553	437	0.040127	0.120381	0	0.105189
GUA 537	57.7	5.01116	-3.84188	96.728
GUA 538	59	5.11586	-3.94271	95.4103	17.8165	-26.9172	0.0150845	0.0814582	0.0965426	11.4518	124.769	98.2632	436	0.0301138	0.120455	0	0.0948659
GUA 539	60	4.54924	-5.71157	96.365
GUA 540	61	5.19467	-4.01669	95.6351
GUA 541	62	5.31087	-2.89424	101.78	1.60328	-26.7241	0.0151281	0.0988623	0.11399	10.4683	88.1139	111.192	433	0.0401765	0.100441	0	0.126748
GUA 542	63.2	4.99136	-3.44272	101.882
GUA 543	64	5.37547	-4.26683	26.7793	0.407303	-27.8824	0.0137627	0.0996521	0.113415	10.5277	79.7541	121.318	431	0.030151	0.090453	0	0.137593
GUA 544	65	4.53044	-7.42887	92.8167
GUA 545	66	4.32813	-5.61152	93.508
GUA 546	67.4	4.33783	-6.10574	91.9571	3.16027	-27.5731	0.0184954	0.118556	0.137051	10.983	102.729	92.8626	436	0.0402261	0.140791	0	0.127269
GUA 547	68	4.29683	-5.30481	105.335
GUA 548	69	4.07722	-5.5157	100.105
GUA 549	70	3.82571	-6.2056	100.576	1.5355	-28.4335	0.0171312	0.123117	0.140248	10.7999	93.2745	98.5094	438	0.0301882	0.130815	0	0.138157
GUA 550	71.4	3.81891	-5.84174	102.07
GUA 551	72.4	4.02042	-7.39751	88.8564
GUA 552	73.5	3.92682	-4.78587	94.9817	2.27483	-27.7523	0.0123999	0.0667276	0.0791274	10.5242	114.595	148.343	459	0.0201502	0.0906761	0	0.11738
GUA 553	74.5	3.5473	-7.20202	98.127
GUA 554	75.5	3.84651	-4.09837	90.8234	1.83434	-27.5995	0.0180157	0.143017	0.161033	11.2933	81.3853	86.3202	434	0.0403253	0.131057	0	0.139004
GUA 555	78	3.18499	-9.18677	93.9594	7.58981	-27.3593	0.0166105	0.16799	0.1846	11.0524	65.5742	63.8447	453	0.04035	0.12105	0	0.117857
GUA 556	79	4.36403	-5.31424	90.4611
GUA 557	80	3.72271	-8.79069	99.3354	2.85916	-26.4296	0.0129407	0.0440502	0.056991	10.749	194.822	131.867	454	0.0201874	0.111031	0	0.0751522
GUA 558	81	4.46364	-6.0431	101.887
GUA 559	82	4.36093	-6.21002	99.4224	0.415793	-26.7426	0.0110235	0.0490014	0.0600248	10.552	134.61	161.299	460	0.0201998	0.0807992	0	0.0968196
GUA 560	83	4.65234	-5.45499	94.3935
GUA 561	84	3.5536	-6.88271	66.1694	0.0679543	-26.4248	0.0132234	0.0468831	0.0601065	7.00505	134.014	194.889	423	0.0402757	0.0805514	0	0.117141
GUA 562	84.7	2.84957	-8.11512	95.1334	0.103175	-25.5334	0.00931317	0.0235184	0.0328315	10.0909	215.472	196.995	462	0.0202122	0.0707427	0	0.0646766
GUA 563	85.5	3.83161	-5.84521	97.6005	1.11686	-26.7401	0.00948432	0.0324254	0.0419097	9.97243	167.349	174.968	462	0.0200387	0.0701354	0	0.0733287
GUA 564	86.3	3.81015	-6.38978	88.7782
GUA 565	87	4.29155	-6.20967	91.4275	1.26767	-27.1348	0.0117409	0.0387172	0.0504581	10.8063	178.932	187.622	453	0.0200635	0.0902856	0	0.0946705
GUA 566	87.7	3.95505	-6.85284	89.1545
GUA 567	88.6	4.55616	-4.34223	96.7275	0.478393	-26.5974	0.0120509	0.0350802	0.0471311	10.0097	170.488	224.106	428	0.0301324	0.0803531	0	0.105624
GUA 568	89.6	4.23375	-4.46634	92.1609
GUA 569	90.5	4.07685	-7.32359	98.0162	1.13298	-27.1663	0.0137765	0.0559406	0.0697171	11.0255	129.823	197.764	460	0.0301696	0.0905087	0	0.137875
GUA 570	91.5	4.25325	-5.87659	74.4819
GUA 571	92.2	4.08765	-6.90546	82.3619
GUA 572	93.2	2.30613	-7.07951	12.3192
GUA 573	95.2	3.20004	-7.26375	65.722	0.3091	-25.6217	0.0135785	0.124706	0.138284	7.22316	58.3222	115.985	475	0.0302439	0.0806505	0	0.160389
GUA 574	96.2	2.01512	-6.31608	97.0952	1.27529	-25.5701	0.0123957	0.0622996	0.0746954	11.5368	121.618	114.985	422	0.0302811	0.0908434	0	0.0858882
GUA 575	97.2	1.33202	-5.99676	95.7015	3.49824	-25.6062	0.010446	0.0329257	0.0433717	11.0739	186.409	173.975	467	0.0202122	0.0808488	0	0.0754561
GUA 576	98.2	4.33015	-5.51137	85.2904
GUA 577	99.2	4.37895	-6.49022	92.0479	8.88802	-25.2915	0.0120617	0.0491005	0.0611622	7.13169	131.701	121.88	431	0.0402757	0.0805514	0	0.0745443
GUA 578	100.2	4.23775	-6.79809	94.8365
GUA 579	101.3	3.67465	-5.65829	87.6952
GUA 580	102.3	4.60856	-7.64369	101.862	0.875176	-23.5642	0.0098904	0.028653	0.0385434	10.516	210.275	140.962	461	0.0202618	0.0810471	0	0.0543313
GUA 581	103.5	4.50086	-7.84419	92.1388
GUA 582	104.6	4.70446	-8.08058	99.8302	5.59919	-24.3295	0.0127298	0.058972	0.0717018	10.7165	141.465	91.2922	435	0.0304299	0.101433	0	0.0654581
GUA 583	105.6	5.15916	-4.85955	98.3135
GUA 584	106.2	5.19307	-5.63577	86.421	1.56692	-26.1738	0.0147349	0.0405199	0.0552548	11.7731	183.797	138.76	425	0.0507784	0.101557	0	0.0766717
GUA 585	107.5	5.19837	-5.63895	89.2694
GUA 586	108.5	5.02556	-8.45233	89.7335
GUA 587	109.5	5.06946	-8.382	97.7721	7.56294	-25.1435	0.0102947	0.0530183	0.063313	11.0931	112.42	156.317	426	0.0203361	0.0711765	0	0.0989686
GUA 588	110.6	5.48657	-5.9829	99.6169
GUA 589	111.4	5.42157	-6.64262	93.869
GUA 590	112	5.27517	-5.01079	98.6968
GUA 591	113	4.98526	-5.72034	93.0456	0.813284	-24.1798	0.014355	0.0949184	0.109273	10.408	83.8486	141.442	431	0.0305414	0.0916242	0	0.154559
GUA 592	114	4.35845	-7.66196	92.2688
GUA 593	115	4.97916	-7.05449	92.8566
GUA 594	116	4.79916	-5.06881	95.4932	1.19219	-26.7815	0.015652	0.1252	0.140852	10.5306	94.0754	55.0814	456	0.0305786	0.132507	0	0.0775834
GUA 595	117	4.21695	-8.69882	90.0325
GUA 596	118.1	5.35547	-6.85717	92.8776
GUA 598	120.6	5.32287	-6.60432	101.717
GUA 599	121	4.81176	-7.68342	103.744
GUA 601	123	5.02696	-6.90027	102.591	3.35286	-24.0045	0.00342511	0.0160462	0.0194713	9.62727	158.951	0	496.913	0.0103166	0.0309498	0	0
GUA 602	124	5.71887	-5.61307	58.1475
GUA 603	125	5.12816	-5.94259	90.1826
GUA 604	126	5.40907	-6.08855	84.6411
GUA 605	127.5	5.36307	-6.04237	93.9508	3.84121	-24.7812	0.0133457	0.029196	0.0425417	10.9643	266.85	190.495	458.957	0.0206405	0.113523	0	0.0810398
GUA 606	128.5	5.61606	-6.43259	88.1609
GUA 607	129.5	5.11027	-7.70024	95.7448
GUA 608	130.5	5.44996	-5.52938	105.379
GUA 609	131.5	5.29507	-6.52457	106.098	7.09277	-24.9888	0.00764406	0.00321012	0.0108542	10.5512	475.067	847.308	444.87	0.0103129	0.0515646	0	0.0919684
GUA 610	133	5.36187	-5.97262	90.9668
GUA 611	135	4.90568	-7.18447	93.5241
GUA 615	137.2	5.38057	-6.68601	91.614
GUA 617	138.5	5.21457	-6.89488	98.1935	2.19937	-25.3453	0.0127674	0.0244036	0.037171	10.8781	277.347	246.547	458.826	0.0206185	0.103093	0	0.0916441
GUA 619	140	4.80938	-7.24623	101.416
GUA 621	141	4.85208	-6.5745	93.2545
GUA 623	142	5.04727	-5.41076	95.0763
GUA 625	143	5.02367	-7.07161	97.2703	3.32629	-25.9812	0.0129876	0.0555655	0.0685532	9.53955	165.363	99.9076	430.783	0.0206112	0.113361	0	0.0684899
GUA 627	144	4.79248	-6.56709	98.9138
GUA 629	145	4.78958	-6.2371	103.058
GUA 631	146	4.66928	-7.20015	96.3413
GUA 633	147	4.51979	-5.04006	101.577	2.11204	-25.8447	0.0095568	0.0276298	0.0371866	10.8141	221.627	183.525	458.739	0.0103019	0.0824153	0	0.0682467
GUA 635	148.2	4.62298	-6.03131	102.591
GUA 637	149.3	4.51939	-4.85929	87.1716
GUA 639	150.4	4.41939	-4.55604	92.6751
GUA 641	151.5	4.51389	-4.84716	100.425
GUA 643	152.5	4.26409	-5.11318	99.8713	14.1531	-24.7264	0.0116386	0.034386	0.0460246	10.9979	179.004	246.258	432.696	0.0205965	0.082386	0	0.113339
GUA 645	153.5	4.38809	-5.4375	98.0773
GUA 647	154.5	4.44859	-5.75288	101.352
GUA 649	156.3	4.47679	-5.82003	100.52
GUA 651	157.3	4.24059	-6.87641	96.8581
GUA 653	158.5	4.47369	-4.81263	92.0058
GUA 655	160	4.28649	-4.96396	99.1569	1.66981	-25.2353	0.0110085	0.0318238	0.0428323	11.2081	192.277	210.932	430.652	0.0205892	0.0823567	0	0.090347
GUA 657	161	4.41969	-5.18274	100.546
GUA 659	162.4	4.24239	-7.21198	89.9011
GUA 661	163.5	3.7861	-7.55603	57.7404
GUA 663	164.5	4.19239	-4.9149	87.678
GUA 665	165.4	4.19099	-4.95646	88.9464
GUA 667	166.3	4.17439	-5.35294	106.597	2.23889	-27.5185	0.0162546	0.0363341	0.0525887	10.8989	215.255	299.57	429.609	0.0308727	0.1132	0	0.15754
GUA 669	167.3	4.39139	-4.83196	99.6297
GUA 671	168	3.31301	-5.47474	98.4911
GUA 673	169.7	4.53539	-6.66196	100.777
GUA 675	171	4.1184	-7.21756	97.8059
GUA 120	172.2	3.81758	-7.82762	87.6332	7.66085	-26.524	0.00829584	0.137231	0.145527	11.0581	35.2263	80.3739	479	0.0102527	0.0512637	0	0.116966
GUA 118	173.3	2.98759	-9.97207	78.4589
GUA 116	174.5	4.00747	-7.04646	86.2267
GUA 114	175.5	3.61638	-7.07849	94.1064
GUA 112	176.5	3.34538	-6.25192	80.1914
GUA 110	177.5	2.93969	-6.59133	83.3423
GUA 108	178.5	2.86099	-9.20774	94.0013	2.52184	-25.9112	0.00473686	0.0392089	0.0439457	11.7245	70.086	110.832	483	0.0102666	0.0307998	0	0.048706
GUA 106	179.9	2.70209	-8.11767	94.8274
GUA 104	180.5	2.87689	-6.45077	85.7383
GUA 102	181.5	2.3598	-7.42569	92.3673
GUA 100	182.5	2.70799	-6.26809	99.3861
GUA 98	183.5	3.67028	-6.46376	90.3946
GUA 96	184.5	3.20258	-7.71555	102.814
GUA 94	185.5	3.01419	-8.10921	98.4103
GUA 92	186.5	2.98439	-7.37586	84.9176	22.4631	-28.6228	0.0199861	0.330661	0.350648	11.515	41.0459	30.54	485	0.0616828	0.143926	0	0.107088
GUA 90	187.5	2.59749	-7.44647	87.1859
GUA 88	188.5	2.63	-8.6	75
GUA 86	189.5	3.15	-6.48	100
GUA 84	190.5	3.73	-9.97	102
GUA 82	191.5	3.5	-5.96	66
GUA 80	193	2.89	-9.09	94	3.14452	-26.8958	0.0159422	0.220877	0.236819	10.4436	47.8161	61.625	484	0.030883	0.113238	0	0.145939
GUA 79	194	3.06	-6.33	100
GUA 78	195	3.02	-5.35	97
GUA 77	196	3.38	-6.87	84
GUA 76	197	3.63	-5.9	97
GUA 75	198	3.1	-5.29	85	5.00913	-26.805	0.0179922	0.358108	0.3761	11.4555	32.8897	33.609	491	0.0515409	0.123698	0	0.126404
GUA 74	199	3.68	-6.77	83
GUA 73	200	3.35	-7.57	94
GUA 72	201	2.81	-8.8	103
GUA 71	202	3.09	-5.08	89
GUA 70	203	2.39	-7.15	102
GUA 69	204	2.41	-5.58	97	14.327	-26.9944	0.00699552	0.0731899	0.0801854	12.1729	64.3636	84.8307	483	0.010322	0.0516102	0	0.0680218
GUA 68	205	2.58	-5.67	97
GUA 67	206	1.78	-7	93
GUA 66	207	2.53	-8.12	88
GUA 65	208	2.07	-6.18	103
GUA 64	209	2.36	-5.84	85	5.96277	-28.3605	0.00706459	0.126449	0.133513	11.633	38.7074	29.0951	483	0.0206718	0.0516795	0	0.0388458
GUA 63	210	2.15	-7.22	103
GUA 62	211	2.24	-5.99	83
GUA 61	212	2.15	-6.01	86	5.97087	-26.4122	0.00423021	0.0330008	0.037231	10.5294	83.3963	78.2051	483	0.0103498	0.0310493	0	0.0291165
GUA 60	213	2.58	-5.72	76
GUA 59	214	2.26	-8.71	94	10.6766	-27.1766	0.0130341	0.14736	0.160394	11.79	58.1521	42.3313	481	0.0414545	0.0932726	0	0.0678969
GUA 58	215	2.12	-7.6	91
GUA 57	216	2.48	-6.59	100
GUA 56	217	2.05	-5.93	93	4.21824	-26.2849	0.00423844	0.0150301	0.0192685	0.0624737	161.572	150.924	481	0.0103775	0.0311324	0	0.0290808
GUA 55	218	2.05	-6.32	93
GUA 54	219	1.68	-6.16	92
GUA 53	220	1.68	-5.57	94	8.36953	-27.6576	0.00702435	0.0921408	0.0991652	11.2492	41.9153	68.3846	483	0.0207827	0.0415653	0	0.0678137
GUA 52	221	1.69	-5.18	101
GUA 51	222	2.2	-6.65	92
GUA 50	223	1.26	-5.91	104	4.42702	-26.3569	0.00218387	0.0421495	0.0443334	11.4634	23.4703	109.192	482	0	0.0104052	0	0.0484086
GUA 49	224	1.59	-6.35	99
GUA 48	225	1.41	-8.29	79	8.01609	-28.1648	0.02505	0.495992	0.521042	11.0793	35.9938	24.1411	484	0.0729334	0.187543	0	0.125785
GUA 47	226	1.63	-8.14	93
GUA 46	227	1.092	-6.36938	93.058	1.01822	-22.02	0.00564827	0.0349612	0.0406095	11.5168	102.763	119.059	482	0.0104329	0.0417317	0	0.0483491
GUA 45	228	1.1229	-6.87009	91.9799
GUA 44	229.5	1.58469	-7.21429	72.3134
GUA 43	231	0.798903	-4.78163	94.5599
GUA 42	232	1.0146	-4.09901	98.2447	1.0596	-26.4054	0.00678386	0.08822	0.0950038	11.1946	21.9923	61.0326	339	0.0417871	0.0208936	0	0.0579833
GUA 41	233	1.1187	-3.5906	90.5648
GUA 40	234	1.4436	-5.72677	78.9297	2.18657	-26.3563	0.00852625	0.0624075	0.0709337	11.4641	73.7353	81.6926	420	0.0313819	0.0523032	0	0.0579476
GUA 39/1	235	1.262	-6.67702	88.5007
GUA 39	235.7	1.3951	-4.06447	92.9343
GUA 38/1	236.4	1.2682	-5.23722	85.594	0.754817	-28.9373	0.00819157	0.0993291	0.107521	11.8707	48.7092	71.8149	487	0.020949	0.0523725	0	0.0772159
GUA 37/1	237.7	0.861503	-5.03694	85.5475	17.8907	-28.1472	0.0111543	0.143439	0.154593	12.1007	47.4913	37.4377	481	0.0419534	0.0734185	0	0.0578762
GUA 37	238.4	0.211809	-3.65823	97.8622	29.1717	-29.0577	0.013864	0.187222	0.201086	11.6873	52.2274	14.382	485	0.0525111	0.105022	0	0.0289203
GUA 36	240	0.456407	-4.9039	100.98	9.00183	-28.0717	0.01	0.13	0.14	11.07	45	42	492	0.03	0.06	0	0.06
GUA 35/1	240.7	0.876202	-5.34929	102.304	27.4932	-29.5014	0.01	0.24	0.25	11.88	33	31	483	0.04	0.08	0	0.08
GUA 35	241.5	1.1915	-6.4979	91.3087
GUA 34/1	242.5	1.2623	-4.42993	101.343	262.911	-27.3907	0.05	0.61	0.66	12.79	56	10	515	0.24	0.37	0	0.07
GUA 34	243.5	1.1177	-5.8324	105.097
GUA 33/1	244.3	1.66789	-5.74476	106.474	37.3755	-29.996	0.0262209	0.499087	0.525307	11.9166	33.6355	14.4229	492.043	0.114329	0.17669	0	0.0757645
GUA 33	245	2.01229	-5.21279	106.718
GUA 32/1	245.6	2.25939	-6.11542	106.422	18.765	-29.7558	0.00635089	0.112396	0.118747	12.0849	35.0417	9.47582	484.087	0.0312083	0.0416111	0	0.0112523
GUA 32	246.5	2.14099	-6.24249	93.2597
GUA 31/1	247.2	2.06829	-6.19314	92.4039
GUA31	248	2.21949	-6.09483	97.4215	25.8323	-29.7499	0.0227877	0.384667	0.407455	11.5273	38.3307	2.86683	485.13	0.114532	0.15618	0	0.011681
GUA 30/1	249	2.42839	-5.83692	97.5683
GUA 30	249.7	2.17029	-6.3866	105.328
GUA 29/1	250.5	2.41179	-5.98237	102.71	66.6549	-29.5479	0.0526056	0.792748	0.845353	11.1136	51.7762	14.3251	493.174	0.156319	0.437692	0	0.121098
GUA 29	251.5	2.19689	-5.24405	93.4763
GUA 28/1	252	2.29759	-5.60133	95.2023
GUA 28	253	2.75848	-6.27568	95.1809	124.768	-27.9605	0.0086573	0.0973223	0.10598	11.5688	59.0518	0	484.217	0.0417219	0.0625829	0	0
GUA 27/1	253.7	2.42279	-6.48135	92.7575
GUA 27	254.5	3.20948	-6.41161	103.719
GUA 26/1	255.2	2.69348	-6.08983	104.185
GUA 26	256	2.66778	-6.23807	93.2435	8.98304	-30.3303	0	0.05	0.06	11.45	35	82	483	0.02	0.02	0	0.05
GUA 25/1	256.5	2.10799	-6.32561	103.306
GUA 25	257.5	2.56388	-6.06607	94.8281
GUA 24/1	258.5	2.78548	-6.49222	97.1806	18.5506	-29.8361	0.048576	0.477925	0.526501	11.4546	77.5963	25.3926	444	0.132777	0.408546	0	0.133692
GUA 24	259	2.41382	-6.08816	95.8097
GUA 23/1	259.9	2.8877	-6.16376	94.5803
GUA 23	260.5	2.87151	-5.89857	90.6159	9.37501	-29.8824	0.0157373	0.113528	0.129265	11.9698	102.717	37.6091	442	0.0408546	0.132777	0	0.0486154
GUA 22/1	261.5	2.69781	-6.03872	95.7188
GUA 22	262.2	2.9335	-6.42905	92.0255	99.8464	-29.8816	0.0150744	0.102762	0.117836	11.5779	112.679	20.6283	442	0.0408546	0.132777	0	0.0243077
GUA 21/1	263.1	2.79711	-6.17098	94.6059
GUA 21	264	2.62901	-6.84825	85.9375	16.0349	-30.7978	0.0348656	0.303719	0.338585	11.6185	90.4971	28.7168	449	0.0817091	0.306409	0	0.0972308
GUA 20/1	264.7	2.36572	-6.01746	81.6875
GUA 20	265.5	2.50262	-6.36336	90.0874
GUA 19/1	266.4	2.67531	-6.34806	84.9694	135.453	-28.1133	0.114514	1.47031	1.58483	11.2927	65.0908	9.96954	499	0.296196	1.03158	0	0.158
GUA 19	267	3.1201	-5.96523	86.4721
GUA 18/1	267.6	2.59011	-5.64328	96.0959
GUA 18	268.5	2.22282	-6.47215	96.4054	1.08915	-29.784	0.0140419	0.0897129	0.103755	12.0059	118.128	46.856	451	0.0306409	0.122564	0	0.0486154
GUA 17	270.5	1.76354	-5.82277	91.3639
GUA 16/1	271.2	2.00983	-5.6755	91.7137	7.77315	-29.3122	0.0203074	0.23358	0.253887	12.0134	68.3894	23.9355	452	0.0510682	0.173632	0	0.0607692
GUA 16	272	1.67684	-6.0164	94.1235
GUA 15/1	272.7	2.15103	-6.51226	86.2413
GUA 15	273.5	2.50762	-6.3144	87.9149	32.2759	-31.1135	0.0493093	0.711179	0.760488	11.1534	49.6924	41.5523	447	0.11235	0.377905	0	0.316
GUA 14/1	274	2.29092	-6.50533	94.8204
GUA 14	274.8	2.33902	-6.81112	89.4783	35.7199	-31.8765	0.0586373	1.11893	1.17757	11.0203	39.7791	36.1829	500	0.0980427	0.468426	0	0.426079
GUA 13/1	275.6	2.27752	-6.97407	98.1487
GUA 13	276.5	1.89303	-7.70088	80.0225	30.9621	-29.5235	0.0384844	0.754721	0.793205	12.6634	37.1199	10.5378	492	0.141766	0.294437	0	0.083586
GUA 12/2	277.5	2.01953	-6.93126	82.0184	47.3422	-29.3099	0.0208983	0.417823	0.438721	12.5297	27.3708	68.6438	489	0.0327495	0.120082	0	0.301155
GUA 12/1	280	0.814067	-8.0915	87.2516	55.8317	-29.2145	0.0441647	0.893815	0.93798	11.4931	31.4564	41.456	491	0.109279	0.295054	0	0.388849
GUA 12	281	1.57864	-6.80804	86.5486
GUA 11	283	0.472177	-7.36806	88.0195	2.46318	-26.7644	0.00597182	0.0403746	0.0463464	11.3071	70.8105	185.124	483	0.0109394	0.0328181	0	0.0857981
GUA 10	284	0.874665	-5.91146	91.7231	1.2188	-28.1266	0.00340105	0.0204979	0.0238989	10.7139	91.6426	103.454	484	0.0109508	0.0219016	0	0.0247244
GUA 9	285	2.25512	-6.33046	94.3418
GUA 8/1	285.7	1.41465	-5.71715	82.4914	9.57905	-27.577	0.00726952	0.0873317	0.0946012	10.6847	34.7635	105.432	481	0.0219245	0.0328867	0	0.0997404
GUA 8	286.5	2.18523	-6.78592	79.7713
GUA 7	287.5	2.50022	-5.39155	75.2363
GUA 6	289	2.37052	-5.24496	90.3149	14.3695	-28.1014	0.0132229	0.184709	0.197931	10.1894	38.8092	76.2257	483	0.032921	0.0768156	0	0.150875
GUA 5/1	289.7	2.9454	-7.09979	88.8838	14.6789	-28.8284	0.0132669	0.156618	0.169885	10.779	45.2633	89.5538	480	0.0329553	0.0768957	0	0.152139
GUA 5	290.5	3.86448	-7.25965	87.8715	41.2837	-27.6973	0.0057427	0.0831739	0.0889166	10.8964	24.7345	86.2621	484	0.0219931	0.0219931	0	0.0767014
GUA 4	291.5	3.1954	-5.22726	91.0945
GUA 3	292.5	3.54289	-4.5546	90.8593	2.99787	-26.1171	0.0113168	0.176703	0.18802	10.8737	17.5641	95.9712	510	0.0440318	0.0330239	0	0.180445
GUA 2	293.5	3.29049	-5.2465	83.3984	2.0844	-28.0109	0.0504968	0.108642	0.159138	10.5002	193.883	383.772	400	0.0991745	0.308543	0	0.610729
GUA 1	295	3.0717	-6.76841	63.2834

## Sheet: Layin Section
Sample No.	Position	Formation	Ccarb	Ocarb	CaCo3
Lay484	0.1	Wuchiaping	4.69825	-4.55612	101.46
Lay483	2	Wuchiaping	2.72672	-6.39611	87.5769
Lay482	6	Wuchiaping	3.79284	-7.7618	57.4902
Lay632	8.5	Wuchiaping	3.93635	-6.78882	86.9821
Lay481	10	Wuchiaping	4.90296	-5.62211	86.3447
Lay480	14	Wuchiaping	4.33815	-6.52417	45.8292
Lay479	16	Wuchiaping	4.53885	-6.64289	95.7762
Lay478	19.8	Wuchiaping	3.23943	-6.14106	57.1478
Lay477	21.9	Wuchiaping	3.82604	-6.96038	98.9081
Lay901	22	Wuchiaping	2.02147	-4.92936	97.7311
Lay900	22.2	Wuchiaping	4.20133	-4.0901	86.8201
Lay899	22.6	Wuchiaping	3.89612	-6.13756	89.0596
Lay898	22.7	Wuchiaping	3.33131	-5.80595	91.3656
Lay896	23.2	Wuchiaping	3.23231	-6.24607	91.7605
Lay895	23.3	Wuchiaping	3.61432	-5.05865	100.158
Lay894	23.4	Wuchiaping	0.666734	-5.66684	105.274
Lay893	23.7	Wuchiaping	3.203	-4.29	105.465
Lay892	24.2	Wuchiaping	4.20723	-4.44652	97.1292
Lay891	24.5	Wuchiaping	4.46434	-4.57678	78.7462
Lay890	24.7	Wuchiaping	4.51474	-4.47009	81.6167
Lay889	25.4	Wuchiaping	4.11009	-5.00687	94.7706
Lay888	25.65	Wuchiaping	3.22089	-6.05526	71.4697
Lay887	25.9	Wuchiaping	0.925607	-5.96405	99.3082
Lay886	26.2	Wuchiaping	3.69118	-4.37779	86.6451
Lay885	26.6	Wuchiaping	4.06943	-4.48221	83.9069
Lay884	26.9	Wuchiaping	2.98821	-6.0238	88.7036
Lay883	27.2	Wuchiaping	4.44935	-5.76201	63.7909
Lay882	27.4	Wuchiaping	3.97779	-6.47569	109.973
Lay881	27.5	Wuchiaping	4.05287	-6.66773	112.734
Lay880	27.7	Wuchiaping	4.15566	-6.40556	112.117
Lay879	27.9	Wuchiaping	4.36223	-5.23651	113.134
Lay878	28.15	Wuchiaping	4.20962	-5.14944	86.8814
Lay877	28.3	Wuchiaping	3.96964	-7.39983	113.91
Lay876	28.6	Wuchiaping	4.4767	-6.00785	111.904
Lay875	28.8	Wuchiaping	4.02465	-5.66517	109.664
Lay874	29.1	Wuchiaping	3.95908	-4.74648	104.95
Lay873	29.3	Wuchiaping	4.50225	-5.31348	107.916
Lay872	29.6	Wuchiaping	4.1219	-4.62905	103.337
Lay871	29.8	Wuchiaping	3.79126	-6.22613	112.6
Lay800	30.4	Wuchiaping	4.12036	-4.91955	101.289
Lay801	30.55	Wuchiaping	3.67557	-5.68067	103.427
Lay802	30.65	Wuchiaping	4.14334	-5.15127	98.7799
Lay803	30.9	Wuchiaping	3.89344	-5.9981	98.4416
Lay804	31.1	Wuchiaping	3.51903	-5.00176	90.2197
Lay805	31.4	Wuchiaping	4.68785	-5.37389	91.3474
Lay806	31.6	Wuchiaping	4.15654	-6.45307	88.4135
Lay807	31.8	Wuchiaping	3.89474	-5.88101	85.4625
Lay808	32.1	Wuchiaping	4.14324	-7.32549	93.143
Lay809	32.2	Wuchiaping	3.10943	-5.42257	104.759
Lay810	32.3	Wuchiaping	3.84681	-5.96981	92.2613
Lay811	32.5	Wuchiaping	3.657	-6.35457	83.201
Lay812	32.7	Wuchiaping	4.16001	-7.84588	84.6138
Lay813	32.9	Wuchiaping	4.57612	-6.36881	108.934
Lay814	33.1	Wuchiaping	4.11691	-5.18787	103.611
Lay815	33.4	Wuchiaping	4.16021	-6.49965	109.708
Lay816	33.6	Wuchiaping	4.11171	-7.37196	100.74
Lay817	33.7	Wuchiaping	4.26812	-6.62462	81.8557
Lay818	33.9	Wuchiaping	4.07161	-7.82115	83.1321
Lay819	34.1	Wuchiaping	3.7157	-5.8364	86.1797
Lay820	34.4	Wuchiaping	0.964037	-6.78885	89.3717
Lay821	34.6	Wuchiaping	3.5791	-5.45985	104.58
Lay822	34.9	Wuchiaping	4.36362	-7.90976	104.364
Lay823	35.1	Wuchiaping	-0.96571	-7.70801	103.766
Lay824	35.3	Wuchiaping	3.6229	-7.66597	108.856
Lay825	35.5	Wuchiaping	3.12229	-7.68406	91.0634
Lay826	35.75	Wuchiaping	2.85698	-8.44371	82.9981
Lay827	35.95	Wuchiaping	3.13159	-6.45107	105.773
Lay828	36.1	Wuchiaping	3.86151	-6.09318	100.49
Lay829	36.2	Wuchiaping	2.83438	-5.76328	103.007
Lay830	36.3	Wuchiaping	2.60318	-5.55211	99.0156
Lay831	36.5	Wuchiaping	3.34259	-5.55519	89.593
Lay832	36.7	Wuchiaping	4.08391	-5.02778	66.4758
Lay833	36.9	Wuchiaping	2.13366	-5.40135	89.1671
Lay834	37.1	Wuchiaping	2.57237	-5.25088	88.7766
Lay835	37.3	Wuchiaping	3.05549	-4.44236	91.403
Lay836	37.45	Wuchiaping	2.35527	-4.68451	95.8528
Lay837	37.7	Wuchiaping	1.94026	-5.19326	101.713
Lay838	37.9	Wuchiaping	3.6207	-4.15826	99.9042
Lay839	38.1	Wuchiaping	3.28969	-5.362	82.2382
Lay840	38.3	Wuchiaping	3.06669	-5.41973	89.1494
Lay841	38.5	Wuchiaping	2.23837	-5.423	62.8202
Lay842	38.7	Wuchiaping	2.81868	-4.8269	84.6077
Lay843.1	38.9	Wuchiaping	3.4474	-7.49944	28.6569
Lay844	39.5	Wuchiaping	2.46217	-4.9639	99.6368
Lay845	39.7	Wuchiaping	-0.265793	-6.78885	97.6071
Lay846	39.9	Wuchiaping	3.96661	-5.71576	101.995
Lay847	40.1	Wuchiaping	2.83458	-6.19746	101.402
Lay848	40.4	Wuchiaping	3.13109	-5.38038	82.6653
Lay849	40.7	Wuchiaping	3.7049	-8.05821	93.8547
Lay850	40.9	Wuchiaping	5.23824	-3.02879	80.903
Lay851	41.1	Wuchiaping	2.97206	-5.681	79.011
Lay852	41.3	Wuchiaping	2.94456	-5.80492	97.2776
Lay853	41.5	Wuchiaping	3.39491	-5.56199	95.5704
Lay854	41.7	Wuchiaping	3.48973	-4.2926	94.9835
Lay855	41.9	Wuchiaping	3.71335	-4.23122	97.6971
Lay856	42.2	Wuchiaping	4.24862	-3.60163	84.493
Lay857	42.5	Wuchiaping	2.65302	-6.84341	28.4127
Lay858	42.7	Wuchiaping	3.23369	-7.90287	81.5932
Lay859	42.9	Wuchiaping	2.37999	-7.38102	80.9809
Lay860	43.1	Wuchiaping	4.02759	-6.36823	53.2401
Lay861	43.3	Wuchiaping	3.74646	-4.46665	94.7219
Lay862	43.4	Wuchiaping	3.99229	-5.19842	64.4854
Lay863	43.55	Wuchiaping	1.33286	-5.49541	100.438
Lay864	43.7	Wuchiaping	2.16926	-5.6378	107.275
Lay865	43.9	Wuchiaping	1.18574	-5.79886	109.152
Lay866	44.3	Wuchiaping	2.81894	-6.21343	110.438
Lay867	44.4	Wuchiaping	2.34498	-5.3308	89.8828
Lay868	44.55	Wuchiaping	3.90438	-3.8967	105.847
Lay869	44.8	Wuchiaping	2.76744	-7.01408	43.9824
Lay870	45.1	Wuchiaping	3.86517	-4.39478	103.28
Lay492	47	Wuchiaping	2.35492	-7.83184	108.04
Lay491	47.5	Wuchiaping	0.256185	-5.68628	93.7926
Lay490	48	Wuchiaping	2.87513	-8.63239	99.7696
Lay489	49	Wuchiaping	3.29263	-10.3204	85.5142
Lay488	50	Wuchiaping	2.89083	-10.2392	82.198
Lay487	50.9	Wuchiaping	3.09973	-8.42323	77.3327
Lay486	52	Wuchiaping	2.22522	-8.80634	60.2828
Lay485	52.5	Wuchiaping	3.04123	-6.6449	100.963
Lay473	55	Wuchiaping	4.39966	-5.58682	102.143
Lay472	57.5	Wuchiaping	3.73929	-6.03074	104.894
Lay471	59	Wuchiaping	5.00833	-5.57441	113.13
Lay470	62	Wuchiaping	4.73274	-5.30579	115.331
Lay625	64	Wuchiaping	4.12947	-5.45974	29.7317
Lay469	65	Wuchiaping	2.35337	-9.72714	110.972
Lay468	67.5	Wuchiaping	3.12453	-7.63986	116.324
Lay467	71	Wuchiaping	3.15722	-9.10591	97.2069
Lay624	73	Wuchiaping	4.62613	-6.27842	80.0911
Lay466	75	Wuchiaping	4.14337	-6.57173	100.515
Lay465	79	Wuchiaping	4.97713	-5.83591	100.549
Lay464	82.5	Wuchiaping	4.77344	-7.10319	90.4003
Lay463	85	Wuchiaping	5.02092	-8.69461	115.661
Lay462	88	Wuchiaping	4.32856	-6.0494	112.005
Lay461	90	Wuchiaping	4.58235	-5.95338	111.423
Lay460	94	Wuchiaping	4.62465	-7.15996	116.853
Lay459	97	Wuchiaping	5.4984	-5.948	92.326
Lay458	100	Wuchiaping	4.69074	-7.69422	96.8567
Lay457	104	Wuchiaping	4.66314	-6.78974	95.5362
Lay456	106.5	Wuchiaping	4.86873	-7.23067	112.196
Lay455	110	Wuchiaping	4.83363	-6.83573	108.405
Lay454	112.5	Wuchiaping	-0.835962	-8.46034	108.774
Lay453	115	Wuchiaping	5.29721	-5.91702	93.5705
Lay452	118	Wuchiaping	5.02322	-6.31331	87.8276
Lay451	121	Wuchiaping	4.73534	-5.64157	95.6651
Lay450	125	Wuchiaping	3.77519	-4.74623	91.4473
Lay449	127.5	Wuchiaping	4.08577	-7.38682	110.697
Lay448	132	Wuchiaping	3.35211	-5.35178	112.609
Lay447	135	Wuchiaping	3.71149	-5.94828	94.2274
Lay446	139.5	Wuchiaping	3.75419	-5.31878	99.8255
Lay445	142.5	Wuchiaping	3.14602	-6.7527	93.3415
Lay444	145	Wuchiaping	3.99748	-6.6258	90.5133
Lay443	148.5	Wuchiaping	3.82994	-7.04917	98.125
Lay442	151	Wuchiaping	2.97483	-6.21038	97.2449
LAY436	172	Wuchiaping	0.900792	-5.89961
LAY435	175.5	Wuchiaping	-2.10446	-7.97446	90.3529
LAY434	179	Wuchiaping	2.19272	-5.38949	88.4027
LAY433	182	Wuchiaping	1.91891	-6.75197	97.6834
LAY432	185.5	Wuchiaping	2.96058	-4.92605	32.0453
LAY431	188	Wuchiaping	1.20502	-5.55195	92.2139
LAY430	192	Wuchiaping	-0.209028	-8.42349	36.0689
LAY429	195	Wuchiaping	1.1793	-6.03441	23.4146
LAY428	198	Wuchiaping	1.36164	-6.2266	90.126
LAY427	202	Wuchiaping	1.81851	-5.97889	27.9503
LAY426	205.5	Wuchiaping	0.877791	-5.26953	95.3058
LAY425	208	Wuchiaping	-6.05933	-8.04566	95.8084
LAY424	212	Wuchiaping	1.3183	-8.34527	91.9812
LAY423	215	Wuchiaping	1.99846	-6.76869	93.7933
LAY421	217.5	Wuchiaping	1.82823	-6.13887	115.093
LAY420	219	Wuchiaping	1.62268	-5.72716	91.9233
LAY419	222.5	Wuchiaping	1.2085	-6.39309	103.827
LAY418	225	Wuchiaping	1.04959	-6.23472	94.8953
LAY417	227	Wuchiaping	1.4423	-7.69313	92.8494
LAY416	229	Wuchiaping	1.72721	-6.53328	101.253
LAY415	230	Wuchiaping	1.1657	-6.93813	92.5896
LAY414	232.5	Wuchiaping	1.75011	-7.0613	116.716
LAY413	235	Wuchiaping	1.86394	-6.41036	91.343
LAY412	238.5	Wuchiaping	1.5876	-5.59414	70.804
LAY410	240.5	Wuchiaping	0.868291	-5.96898	93.3939
LAY409	243	Wuchiaping	1.3701	-5.07978	88.1822
LAY408	245.5	Wuchiaping	2.22312	-6.39252	92.5612
LAY407	248	Wuchiaping	2.89042	-6.95962	88.3342
LAY406	250.5	Wuchiaping	2.3658	-7.26361	111.918
LAY405	253	Wuchiaping	2.76643	-6.29794	94.0939
LAY403	255.5	Wuchiaping	3.18434	-6.49813	92.0811
LAY402	257.5	Wuchiaping	2.81963	-7.07688	68.6037
LAY400	259	Wuchiaping	3.04393	-6.49864	82.6244

## Sheet: Potuo Section
Sample No	Position	Formation	Corg	d13C VPDB	d18O VPDB	Yield % as CaCO3	PC [%]	RC [%]	TOC [%]	MINC [%]	HI [mg HC/g TOC]	OI [mg CO2/g TOC]	Tmax [°C]	S1 [mg HC/g]	S2a [mg HC/g]	S2b [mg HC/g]	S3
POT22	0.6m	Wuchiaping	-26.9506	3.97863	-5.54678	105.341	0.00877067	0.0241409	0.0329116	10.4149	217.235	221.573	457	0.0102136	0.0714955	0	0.0729231
POT23	1.3m	Wuchiaping	-25.2421	3.60984	-5.73277	84.072
POT24	1.8m	Wuchiaping	-24.9418	3.61084	-4.66061	93.9898
POT25	2.2m	Wuchiaping	-27.3478	3.35374	-5.97803	86.5716	0.0104661	0.0606786	0.0711447	9.28703	100.493	102.5	419	0.0306409	0.0714955	0	0.0729231
POT26	2.55m	Wuchiaping	-27.2826	3.83423	-5.50531	88.3215
POT27	2.9m	Wuchiaping	-25.6434	2.72926	-6.01738	97.2181
POT28	3.95m	Wuchiaping	-25.1469	-2.71942	-9.54608	101.957	0.00792294	0.038495	0.0464179	10.9787	110.018	157.101	465	0.0204273	0.0510682	0	0.0729231
POT29	4.9m	Wuchiaping	-24.8184	2.41946	-6.07377	91.3248
POT30	5.25m	Wuchiaping	-23.5215	2.56739	-8.23849	105.243	0.00759147	0.0326229	0.0402144	10.3796	152.388	151.113	459	0.0102136	0.0612818	0	0.0607692
POT31	5.6m	Wuchiaping	-24.8985	2.36097	-6.0423	87.9105
POT32	5.9m	Talung	-25.4784	2.39306	-6.79261	39.9883
POT33	6m	Talung	-25.6721	2.64556	-6.89768	37.2656
POT34	6.3m	Talung	-25.4986	2.32357	-6.98437	36.0056
POT35	6.8m	Talung	-26.6199	2.51286	-6.79521	65.3729	0.0320936	0.0750326	0.107126	5.63208	143.013	431.123	399	0.0817091	0.153205	0	0.461846
POT36	7.05m	Talung	-26.5436	1.37239	-2.50697	107.554
POT37	7.5m	Talung	-29.7093	1.40819	-6.72218	4.88339	0.053203	0.288346	0.341549	0.101122	150.188	45.09	257.2	0.0774289	0.512967	0	0.154004
POT38	8.15m	Talung	-25.5166	NA	NA	0
POT39	8.5m	Talung	-25.6524	NA	NA	0
POT40	8.9m	Talung	-26.3221	NA	NA	0
POT41	9.25m	Talung	-27.2314	NA	NA	0
POT42	10.2m	Talung	-26.4127	NA	NA	0	0.0778919	2.29893	2.37683	0.104194	10.3132	52.1575	536	0.285982	0.245127	0	1.23969
POT43	10.8m	Talung	-26.6438	NA	NA	0
POT44	11.1m	Talung	-25.3729	NA	NA	0
POT45	11.85m	Talung	-25.3185	NA	NA	0
POT46	12.45m	Talung	-25.7684	NA	NA	0
POT47	12.9m	Talung	-25.6848	NA	NA	0	0.030264	0.867924	0.898188	0.0519639	20.4904	41.4953	501.28	0.0581185	0.184042	0	0.372706
POT48	13.4m	Talung	-26.0162	NA	NA	0
POT49	13.9m	Talung	-25.6159	NA	NA	0	0.0179109	0.442693	0.460603	0.0341302	22.1745	21.1094	466	0.0817091	0.102136	0	0.0972308
POT50	14.45m	Talung	-25.9053	NA	NA	0
POT51	14.9m	Talung	-25.9771	NA	NA	0
POT52	15.2m	Talung	-25.4473	NA	NA	0
POT53	15.8m	Talung	-26.4217	NA	NA	0
POT54	16.2m	Talung	-26.0704	NA	NA	0
POT55	16.8m	Talung	-26.04	NA	NA	0
POT56	17.2m	Talung	-30.07	NA	NA	0
POT57	17.7m	Talung	-26.32	NA	NA	0
POT58	18.45m	Talung	-28.29	NA	NA	0	0.0258339	0.329817	0.355651	0.0266955	34.4618	47.8429	428	0.132777	0.122564	0	0.170154
POT59	19.2m	Talung	-25.88	NA	NA	0
POT60	19.8m	Talung	-25.35	NA	NA	0	0.0325108	0.788078	0.820589	0.07925	18.9324	84.0503	494.52	0.00970984	0.155357	0	0.689707
POT61	20.2m	Talung	-25.14	NA	NA	0
POT62	21.2m	Talung	-28.24	NA	NA	0
POT63	21.8m	Talung	-25.93	NA	NA	0
POT64	22.5m	Talung	-25.7	NA	NA	0	0.0602525	1.65406	1.71431	0.0693084	31.1269	30.6972	452.44	0.0194041	0.533612	0	0.526245
POT69	0.2m	Daye	-29.88	-4.1077	-2.47355	47.8906
POT70	0.5m	Daye	-29.99	-3.75559	-2.53619	50.081	0.095113	0.527866	0.622979	6.1091	162.356	27.6936	447.68	0.0778036	1.01145	0	0.172525
POT71	0.6m	Daye	-29.89	-3.29278	-2.73999	52.5553
POT72	0.8m	Daye	-29.93	-3.9244	-2.5361	50.5791
POT73	1.2m	Daye	-30.17	-4.2642	-2.98718	59.9819
POT74	1.4m	Daye	-31.11	-4.64061	-2.7881	23.5277
POT75	1.8m	Daye	-31.61	-4.58251	-2.66042	62.8142	0.217395	1.11898	1.33638	6.3909	180.337	5.60307	453.6	0.184635	2.40998	0	0.074878
POT76	2m	Daye	-30.34	-4.0653	-2.78781	63.2432
POT77	2.25m	Daye	-28.94	-4.36041	-2.75183	47.4676
POT78	2.55m	Daye	-29.52	-3.9178	-3.19502	56.5928
POT79	2.9m	Daye	-28.67	-3.58759	-3.2414	45.2084
POT80	3.2m	Daye	-28.97	-3.37478	-2.93339	32.0357	0.235791	1.72965	1.96544	3.46805	135.69	8.84795	448.76	0.116799	2.66691	0	0.173901
POT81	3.5m	Daye	-27.35	-2.96817	-3.66949	72.1555
POT82	3.7m	Daye	-25.89	-2.55546	-5.1486	75.1689
POT83	4.1m	Daye	-28.07	-3.19638	-5.3319	77.1841
POT84	4.6m	Daye	-27.22	-2.64936	-4.21939	79.3485	0.0181908	0.102917	0.121107	5.90528	104.563	208.047	410.84	0.00974106	0.126634	0	0.25196
POT85	5.1m	Daye	-26.48	-2.09615	-3.18492	45.4147
POT86	5.5m	Daye	-27.78	-1.85705	-4.61409	84.1659
POT87	6.1m	Daye	-26.27	-2.50706	-7.0175	35.2393	0.0156565	0.111104	0.12676	4.45263	115.362	78.3899	395.92	0.00974887	0.146233	0	0.099367

## Sheet: Laxian Section
Sample No	Position	Formation	Corg
LAX 20	0.01	Talung	-26.0294
LAX 21	0.5	Talung	-25.6404
LAX 22	1.15	Talung	-25.1707
LAX 23	2.05	Talung	-24.7077
LAX 24	2.8	Talung	-24.8401
LAX 25	3.45	Talung	-24.8294
LAX 26	3.95	Talung	-25.475
LAX 27	4.45	Talung	-27.4621
LAX 28	4.95	Talung	-26.3933
LAX 29	5.95	Talung	-26.7204
LAX 30	6.8	Talung	-25.7254
LAX 31	7.05	Daye	-28.1486
LAX 32	8	Daye	-28.724
LAX 33	8.95	Daye	-26.6731
LAX 34	9.9	Daye	-30.2103
LAX 35	10.85	Daye	-29.531
LAX 36	11.8	Daye	-29.5998
LAX 37	12.5	Daye	-28.9412
LAX 38	13.8	Daye	-28.3113
LAX 39	14.9	Daye	-27.6985
LAX 40	15.9	Daye	-28.2049
LAX 41	17	Daye	-28.2578
LAX 42	18	Daye	-29.1128
LAX 43	19	Daye	-27.3643
